# Supplementary material
Source: PubMed Central journal article supplement (PMC3007643)

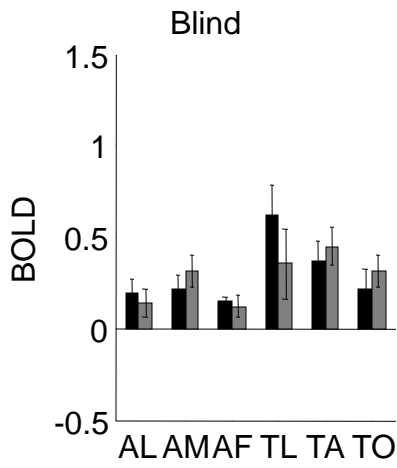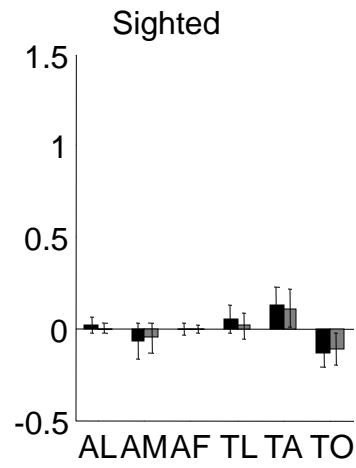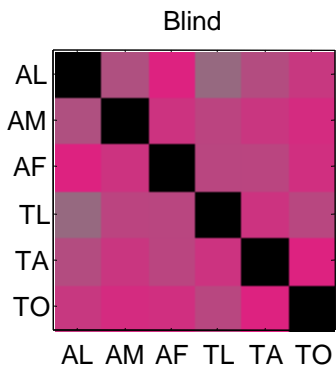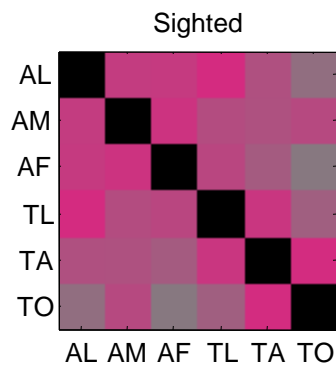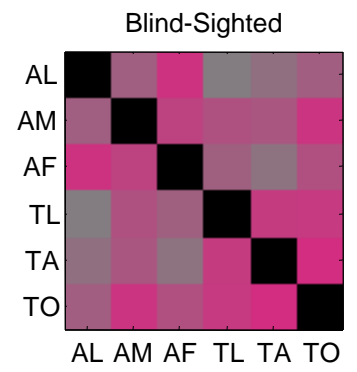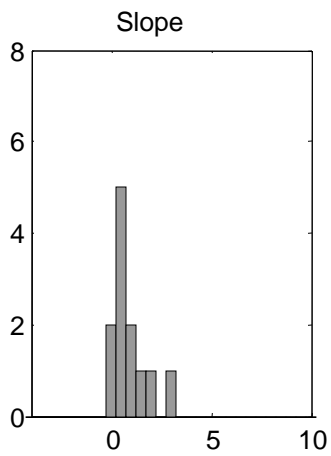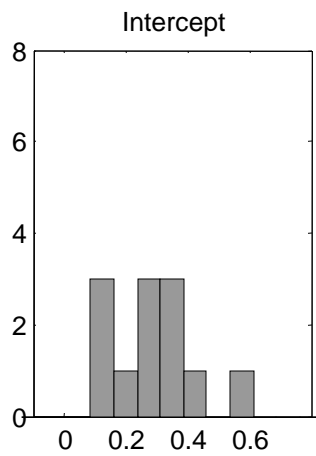

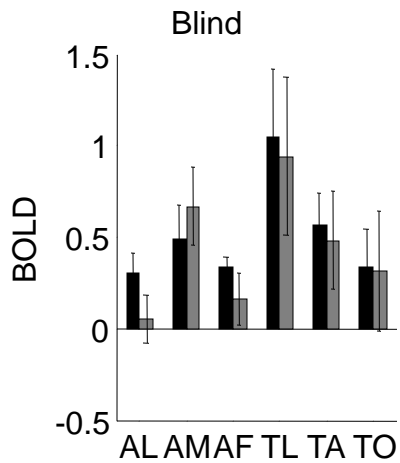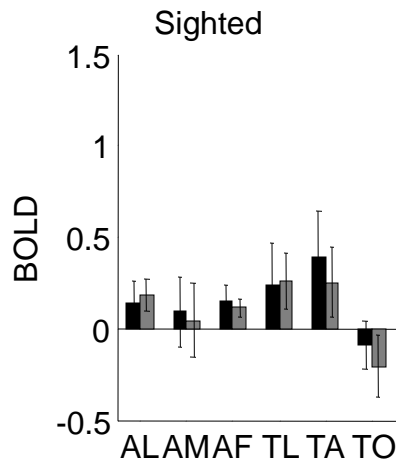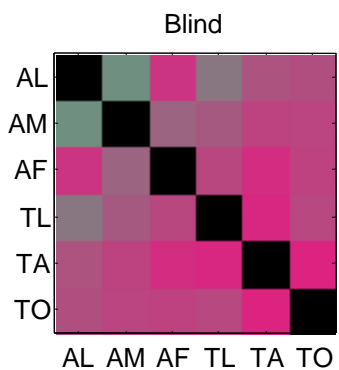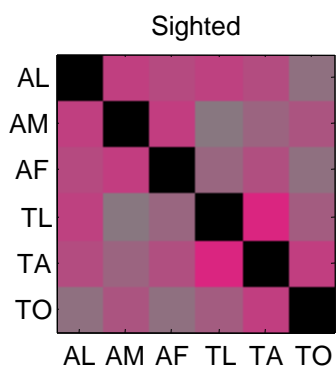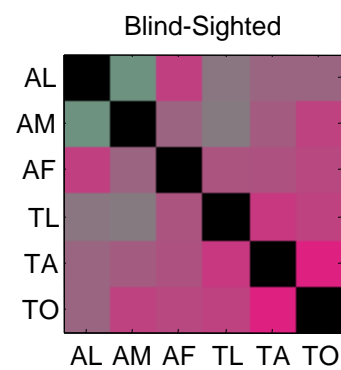

*The non-attenuated slope could not be calculated because within the voxels of the Foveal ROI correlations between blind subjects were not positive.*

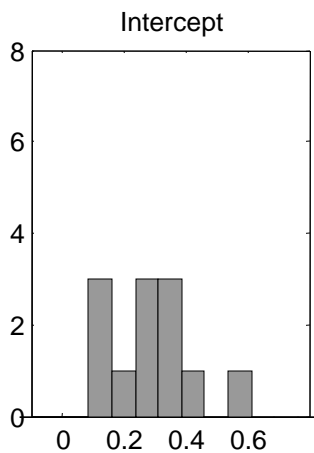

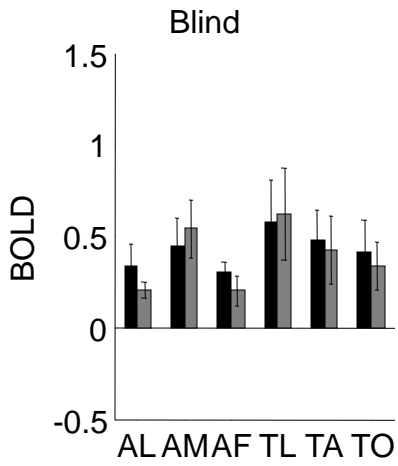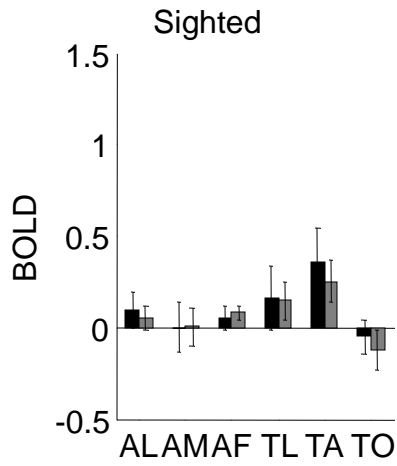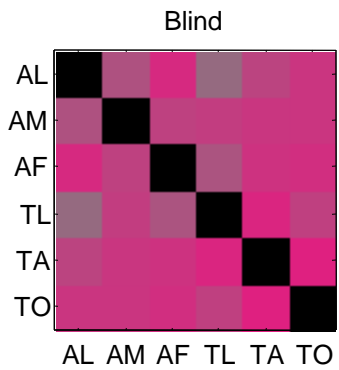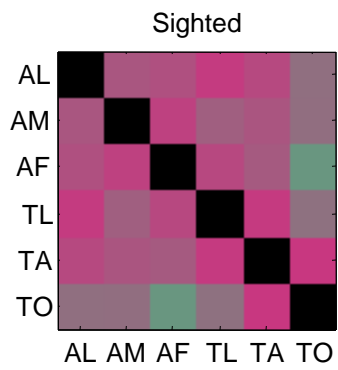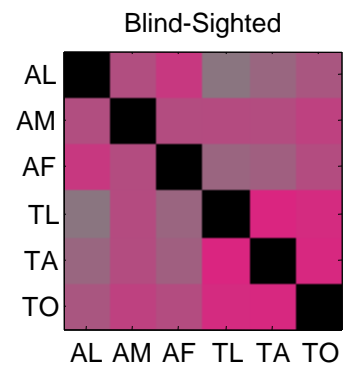

*The non-attenuated slope could not be calculated because within the voxels of the Peripheral ROI correlations between sighted subjects were not positive.*

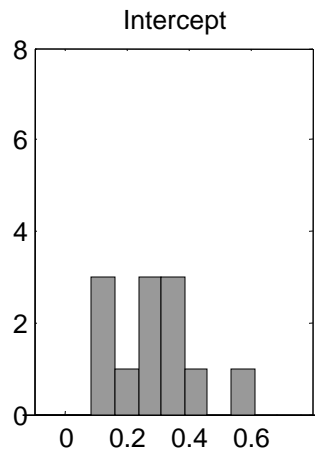

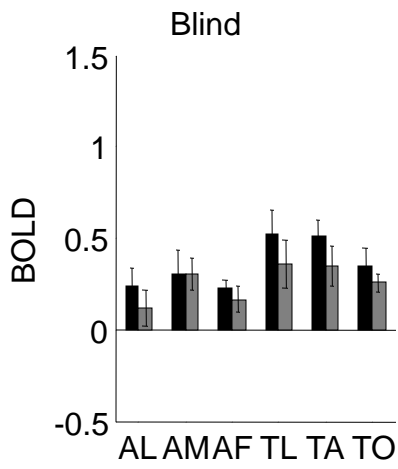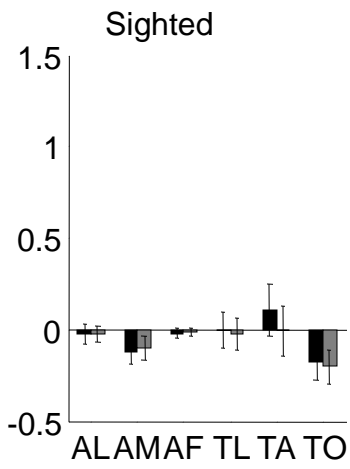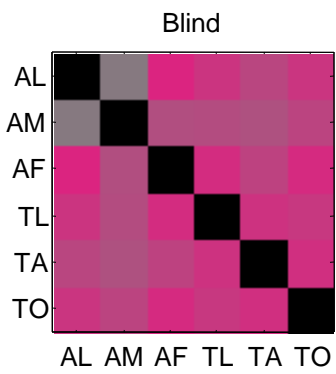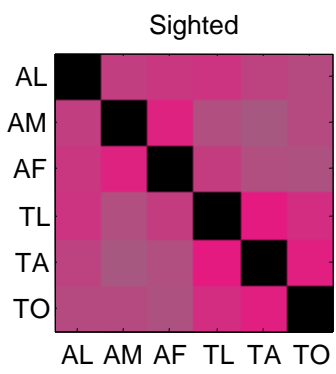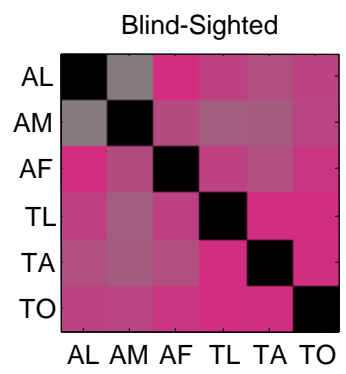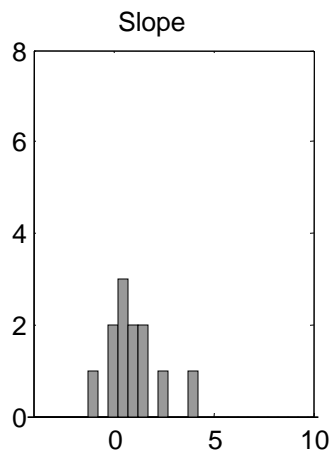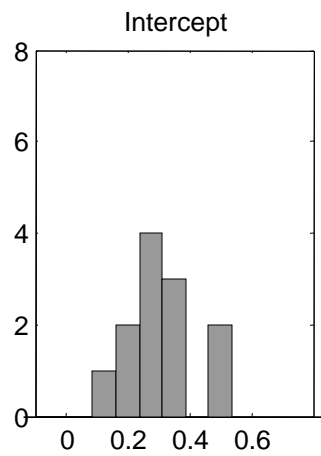

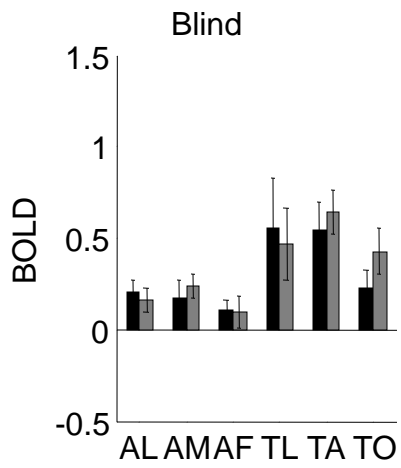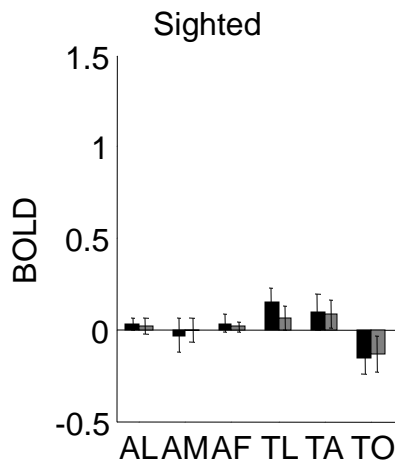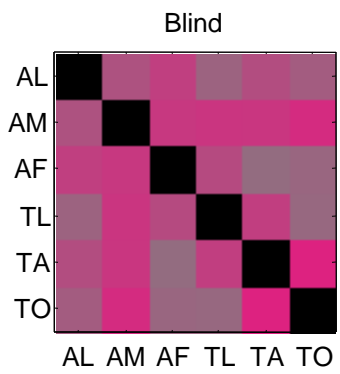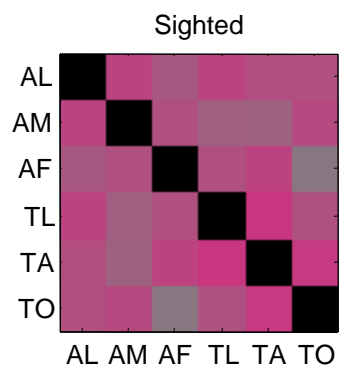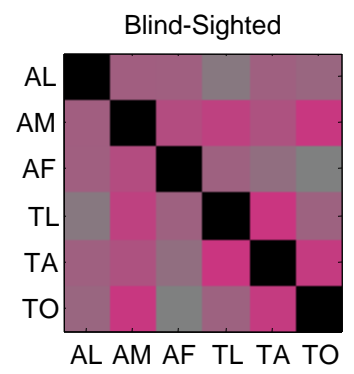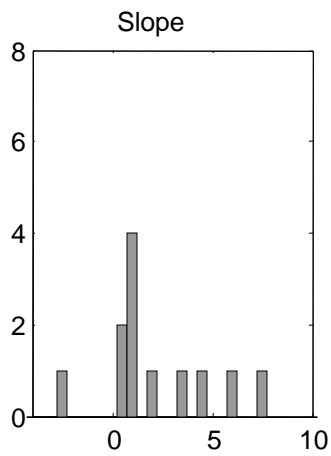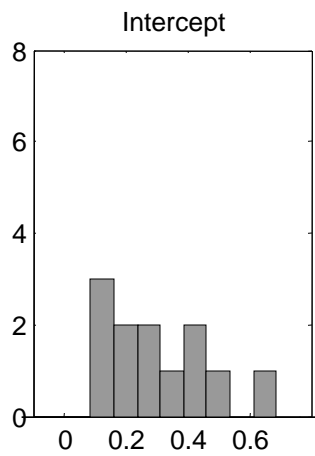

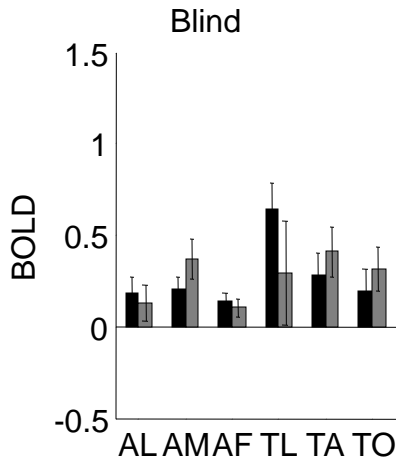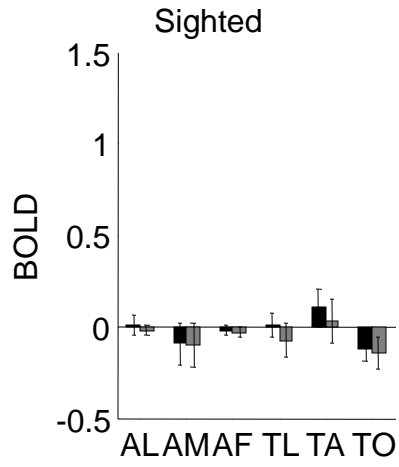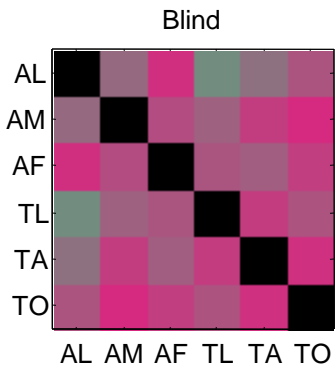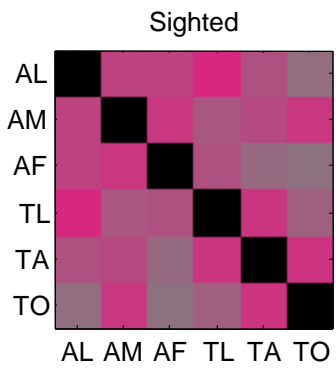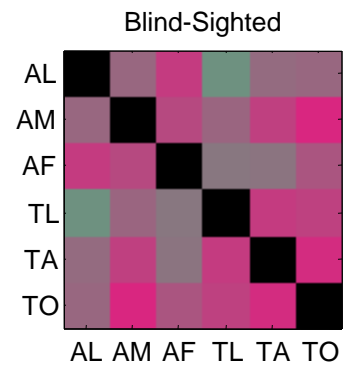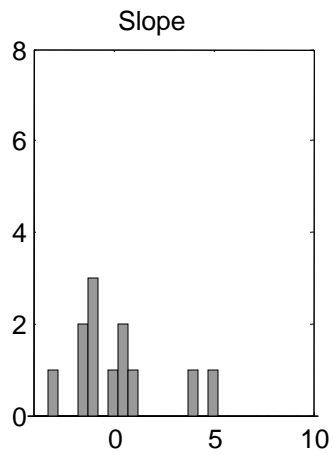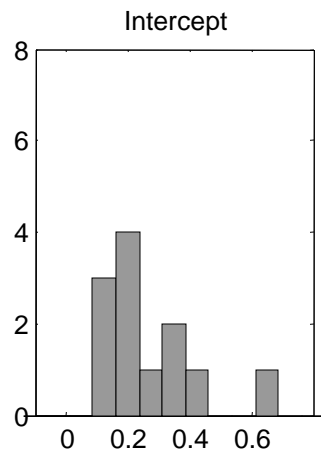

Supplement: supp_00983.2009_jn_figs.pdf [file supp_00983.2009_jn_figs.pdf]
